# Supplementary material
Source: publisher figshare collection journal article supplement (https://future-science-group.figshare.com/ndownloader/files/31620005)
Supplement: Supplementary file 1 [file 31620005]

## Sheet: Table S1
Table S1 Taxonomic identity of 16 randomly chosen multi-copy Eukarya BUSCOs identified in CMW55930 Assembly 1
BUSCO #	BUSCO ID	Query	Subject Accession	Description	Start	End	Bitscore	Eval	%ID	Coverage	Species	Family
1	1032689at2759	NODE_82_length_191622_cov_69.963515:9384-10820	gi|1002197828|gb|KXS94046.1|	hypothetical protein AC578_3383 [Pseudocercospora eumusae]	19	490	630	0.0	66.046	99	Pseudocercospora eumusae	Mycosphaerellaceae
1	1032689at2759	NODE_82_length_191622_cov_69.963515:9384-10820	gi|1002220118|gb|KXT15034.1|	hypothetical protein AC579_4885 [Pseudocercospora musae]	5	478	632	0.0	66.461	99	Pseudocercospora musae	Mycosphaerellaceae
2	1115196at2759	NODE_276_length_75025_cov_68.230561:62800-64541	gi|1500600515|gb|RMY50004.1|	hypothetical protein D0865_07153 [Hortaea werneckii]	10	514	739	0.0	69.922	100	Hortaea werneckii	Teratosphaeriaceae
2	1115196at2759	NODE_276_length_75025_cov_68.230561:62800-64541	gi|1500599207|gb|RMY49021.1|	hypothetical protein D0865_07742 [Hortaea werneckii]	10	513	739	0.0	70.450	100	Hortaea werneckii	Teratosphaeriaceae
3	1228942at2759	NODE_411_length_45736_cov_56.936550:26899-27778	gi|1000488769|gb|KXL48787.1|	hypothetical protein FE78DRAFT_141282 [Acidomyces richmondensis]	1	276	457	7.71e-161	76.408	100	Acidomyces richmondensis	Teratosphaeriaceae
3	1228942at2759	NODE_411_length_45736_cov_56.936550:26899-27778	gi|398395243|ref|XP_003851080.1|	proteasome core particle subunit beta 7 MYCGRDRAFT_74168 [Zymoseptoria tritici IPO323]	1	277	450	4.60e-158	75.704	100	Zymoseptoria tritici IPO323	Mycosphaerellaceae
4	1312453at2759	NODE_724_length_13736_cov_58.807215:6506-11140	gi|1000484526|gb|KXL45164.1|	hypothetical protein FE78DRAFT_148762 [Acidomyces richmondensis]	1	1557	2245	0.0	69.745	100	Acidomyces richmondensis	Teratosphaeriaceae
4	1312453at2759	NODE_724_length_13736_cov_58.807215:6506-11140	gi|1631755427|gb|TKA32660.1|	hypothetical protein B0A54_15464 [Friedmanniomyces endolithicus]	1	1548	2232	0.0	69.512	100	Friedmanniomyces endolithicus	Teratosphaeriaceae
5	1440961at2759	NODE_747_length_12752_cov_30.521464:10455-11411	gi|631384376|ref|XP_007926568.1|	hypothetical protein MYCFIDRAFT_188358 [Pseudocercospora fijiensis CIRAD86]	8	320	450	1.23e-156	68.770	99	Pseudocercospora fijiensis CIRAD86	Mycosphaerellaceae
5	1440961at2759	NODE_747_length_12752_cov_30.521464:10455-11411	gi|1338079372|ref|XP_023622206.1|	related to DNA repair exonuclease rad1 [Ramularia collo-cygni]	7	323	446	1.18e-154	68.125	100	Ramularia collo-cygni	Mycosphaerellaceae
6	270107at2759	NODE_262_length_78018_cov_56.761821:30893-34046	gi|627811755|ref|XP_007679225.1|	hypothetical protein BAUCODRAFT_37024 [Baudoinia panamericana UAMH 10762]	1	993	1566	0.0	75.545	100	Baudoinia panamericana UAMH 10762	Teratosphaeriaceae
6	270107at2759	NODE_262_length_78018_cov_56.761821:30893-34046	gi|1631772393|gb|TKA47665.1|	hypothetical protein B0A54_02039 [Friedmanniomyces endolithicus]	1	999	1549	0.0	74.409	99	Friedmanniomyces endolithicus	Teratosphaeriaceae
7	1513531at2759	NODE_352_length_58761_cov_62.288119:2548-3288	gi|1631748907|gb|TKA26426.1|	Pre-mRNA-splicing factor ISY1 [Friedmanniomyces endolithicus]	1	245	322	2.64e-108	66.800	100	Friedmanniomyces endolithicus	Teratosphaeriaceae
7	1513531at2759	NODE_352_length_58761_cov_62.288119:2548-3288	gi|1631776164|gb|TKA50813.1|	Pre-mRNA-splicing factor isy1 [Friedmanniomyces simplex]	1	245	318	7.93e-107	66.000	100	Friedmanniomyces simplex	Teratosphaeriaceae
8	1623701at2759	NODE_641_length_18775_cov_56.306038:8714-9277	gi|452836420|gb|EME38364.1|	hypothetical protein DOTSEDRAFT_57478 [Dothistroma septosporum NZE10]	11	185	248	4.32e-81	67.196	100	Dothistroma septosporum NZE10	Mycosphaerellaceae
8	1623701at2759	NODE_641_length_18775_cov_56.306038:8714-9277	gi|1002218300|gb|KXT13271.1|	hypothetical protein AC579_2476 [Pseudocercospora musae]	10	182	237	1.03e-76	64.362	100	Pseudocercospora musae	Mycosphaerellaceae
9	176625at2759	NODE_514_length_31421_cov_54.320125:26734-30240	gi|1500699267|gb|RMZ32304.1|	hypothetical protein D0859_03563 [Hortaea werneckii]	1	1138	1444	0.0	60.153	100	Hortaea werneckii	Teratosphaeriaceae
9	176625at2759	NODE_514_length_31421_cov_54.320125:26734-30240	gi|1500647126|gb|RMY88768.1|	hypothetical protein D0861_04642 [Hortaea werneckii]	1	1138	1442	0.0	59.558	100	Hortaea werneckii	Teratosphaeriaceae
10	551907at2759	NODE_112_length_158850_cov_70.215098:89300-91975	gi|1000480848|gb|KXL42087.1|	hypothetical protein FE78DRAFT_94084 [Acidomyces richmondensis]	1	870	1228	0.0	70.056	100	Acidomyces richmondensis	Teratosphaeriaceae
10	551907at2759	NODE_112_length_158850_cov_70.215098:89300-91975	gi|1005698895|gb|KYG40996.1|	hypothetical protein M433DRAFT_510531 [Acidomyces richmondensis BFW]	3	872	1228	0.0	70.056	100	Acidomyces richmondensis BFW	Teratosphaeriaceae
11	341721at2759	NODE_48_length_238638_cov_63.658997:32500-34524	gi|1631752017|gb|TKA29382.1|	hypothetical protein B0A54_16266 [Friedmanniomyces endolithicus]	4	660	731	0.0	58.565	99	Friedmanniomyces endolithicus	Teratosphaeriaceae
11	341721at2759	NODE_48_length_238638_cov_63.658997:32500-34524	gi|1631812811|gb|TKA82799.1|	hypothetical protein B0A55_01793 [Friedmanniomyces simplex]	4	667	736	0.0	58.721	99	Friedmanniomyces simplex	Teratosphaeriaceae
12	426305at2759	NODE_141_length_131896_cov_73.012279:62040-64349	gi|1000484970|gb|KXL45544.1|	hypothetical protein FE78DRAFT_90393 [Acidomyces richmondensis]	1	753	1195	0.0	78.497	100	Acidomyces richmondensis	Teratosphaeriaceae
12	426305at2759	NODE_141_length_131896_cov_73.012279:62040-64349	gi|1631749114|gb|TKA26621.1|	hypothetical protein B0A50_04729 [Hortaea thailandica]	1	768	1200	0.0	80.724	100	Hortaea thailandica	Teratosphaeriaceae
13	777920at2759	NODE_283_length_73390_cov_54.126745:32919-34973	gi|1631795517|gb|TKA67034.1|	hypothetical protein B0A55_09306 [Friedmanniomyces simplex]	1	696	1001	0.0	72.831	100	Friedmanniomyces simplex	Teratosphaeriaceae
13	777920at2759	NODE_283_length_73390_cov_54.126745:32919-34973	gi|1631799831|gb|TKA70792.1|	hypothetical protein B0A55_06906 [Friedmanniomyces simplex]	1	700	981	0.0	71.146	100	Friedmanniomyces simplex	Teratosphaeriaceae
14	836599at2759	NODE_71_length_205296_cov_72.670866:121317-122952	gi|1631767561|gb|TKA43375.1|	hypothetical protein B0A54_05857 [Friedmanniomyces endolithicus]	1	512	821	0.0	80.350	100	Friedmanniomyces endolithicus	Teratosphaeriaceae
14	836599at2759	NODE_71_length_205296_cov_72.670866:121317-122952	gi|1631794530|gb|TKA66204.1|	hypothetical protein B0A55_08627 [Friedmanniomyces simplex]	1	512	823	0.0	80.739	100	Friedmanniomyces simplex	Teratosphaeriaceae
15	674160at2759	NODE_63_length_216764_cov_71.021017:6976-14544	gi|1631753123|gb|TKA30448.1|	hypothetical protein B0A50_02675 [Hortaea thailandica]	8	2528	2980	0.0	60.322	100	Hortaea thailandica	Teratosphaeriaceae
15	674160at2759	NODE_63_length_216764_cov_71.021017:6976-14544	gi|1500505465|gb|RMX81583.1|	hypothetical protein D0869_06705 [Hortaea werneckii]	2	2518	2914	0.0	60.627	100	Hortaea werneckii	Teratosphaeriaceae
16	996662at2759	NODE_530_length_29196_cov_59.590395:14846-15792	gi|627801463|ref|XP_007674079.1|	hypothetical protein BAUCODRAFT_146018 [Baudoinia panamericana UAMH 10762]	1	295	484	6.85e-171	75.593	100	Baudoinia panamericana UAMH 10762	Teratosphaeriaceae
16	996662at2759	NODE_530_length_29196_cov_59.590395:14846-15792	gi|1631752533|gb|TKA29882.1|	hypothetical protein B0A50_03246 [Hortaea thailandica]	1	295	479	3.32e-169	75.932	100	Hortaea thailandica	Teratosphaeriaceae
1	1032689at2759	NODE_35_length_289582_cov_22.040697:182436-183920	gi|902270049|emb|CRL26424.1|	tRNA methyltransferase complex GCD14 subunit [Penicillium camemberti]	1	495	993	0.0	96.970	100	Penicillium camemberti	Trichocomaceae
1	1032689at2759	NODE_35_length_289582_cov_22.040697:182436-183920	gi|1168063800|gb|OQD66002.1|	hypothetical protein PENPOL_c005G10555 [Penicillium polonicum]	1	495	993	0.0	96.768	100	Penicillium polonicum	Trichocomaceae
2	1115196at2759	NODE_151_length_127841_cov_23.571686:101589-103145	gi|902274032|emb|CRL22121.1|	Phenylalanyl-tRNA synthetase, class IIc, mitochondrial [Penicillium camemberti]	1	519	1042	0.0	95.954	100	Penicillium camemberti	Trichocomaceae
2	1115196at2759	NODE_151_length_127841_cov_23.571686:101589-103145	gi|1168094202|gb|OQD94652.1|	hypothetical protein PENSOL_c024G05985 [Penicillium solitum]	1	519	1043	0.0	96.532	100	Penicillium solitum	Trichocomaceae
3	1228942at2759	NODE_80_length_195706_cov_21.428793:32961-33789	gi|700492671|gb|KGO76658.1|	Proteasome endopeptidase complex, beta subunit [Penicillium italicum]	10	260	509	0.0	97.610	100	Penicillium italicum	Trichocomaceae
3	1228942at2759	NODE_80_length_195706_cov_21.428793:32961-33789	gi|1168097154|gb|OQD97479.1|	hypothetical protein PENSOL_c012G10369 [Penicillium solitum]	10	260	509	0.0	97.610	100	Penicillium solitum	Trichocomaceae
4	1312453at2759	NODE_1_length_970254_cov_21.844076:429719-434632	gi|902274427|emb|CRL22518.1|	Regulatory associated protein of TOR [Penicillium camemberti]	1	1602	3162	0.0	95.568	100	Penicillium camemberti	Trichocomaceae
4	1312453at2759	NODE_1_length_970254_cov_21.844076:429719-434632	gi|1168097697|gb|OQD97999.1|	hypothetical protein PENSOL_c010G11076 [Penicillium solitum]	1	1602	3159	0.0	95.818	100	Penicillium solitum	Trichocomaceae
5	1440961at2759	NODE_9_length_476266_cov_20.629079:10623-12373	gi|700476851|gb|KGO64538.1|	Rad1/Rec1/Rad17 [Penicillium italicum]	1	442	828	0.0	91.403	96	Penicillium italicum	Trichocomaceae
5	1440961at2759	NODE_9_length_476266_cov_20.629079:10623-12373	gi|255947412|ref|XP_002564473.1|	Pc22g04350 [Penicillium rubens Wisconsin 54-1255]	1	422	796	0.0	88.864	96	Penicillium rubens Wisconsin 54-1255	Trichocomaceae
6	270107at2759	NODE_224_length_90705_cov_20.256856:39411-42586	gi|902272885|emb|CRL23950.1|	Sulfatase [Penicillium camemberti]	1	1018	2024	0.0	95.777	100	Penicillium camemberti	Trichocomaceae
6	270107at2759	NODE_224_length_90705_cov_20.256856:39411-42586	gi|1168093565|gb|OQD94075.1|	hypothetical protein PENSOL_c028G05416 [Penicillium solitum]	1	1018	2025	0.0	95.873	100	Penicillium solitum	Trichocomaceae
7	1513531at2759	NODE_190_length_104794_cov_20.413006:83978-84904	gi|902266720|emb|CRL29822.1|	Isy1-like splicing [Penicillium camemberti]	4	250	487	2.56e-173	96.761	90	Penicillium camemberti	Trichocomaceae
7	1513531at2759	NODE_190_length_104794_cov_20.413006:83978-84904	gi|1168195251|gb|OQE92597.1|	hypothetical protein PENNAL_c0007G04906 [Penicillium nalgiovense]	1	274	535	0.0	95.985	100	Penicillium nalgiovense	Trichocomaceae
8	1623701at2759	NODE_2932_length_1681_cov_1.177606:685-1424	gi|859262527|emb|CEJ59234.1|	Putative ER membrane DUF1077 domain protein [Penicillium brasilianum]	1	185	255	5.78e-84	74.054	89	Penicillium brasilianum	Trichocomaceae
8	1623701at2759	NODE_187_length_105974_cov_21.483325:34435-35106	gi|973786440|gb|KUM60131.1|	hypothetical protein ACN42_g7013 [Penicillium freii]	1	186	376	1.02e-131	99.462	100	Penicillium freii	Trichocomaceae
8	1623701at2759	NODE_187_length_105974_cov_21.483325:34435-35106	gi|1168083847|gb|OQD84838.1|	hypothetical protein PENSOL_c110G04962 [Penicillium solitum]	1	186	377	4.01e-132	100.000	100	Penicillium solitum	Trichocomaceae
8	1623701at2759	NODE_2932_length_1681_cov_1.177606:685-1424	gi|1120645530|gb|OKO91886.1|	ER membrane protein complex subunit 4 [Penicillium subrubescens]	1	185	250	3.71e-82	73.514	89	Penicillium subrubescens	Trichocomaceae
9	176625at2759	NODE_214_length_94755_cov_19.206423:65470-68682	gi|902275688|emb|CRL20090.1|	Nrap protein [Penicillium camemberti]	1	1071	2182	0.0	98.693	100	Penicillium camemberti	Trichocomaceae
9	176625at2759	NODE_214_length_94755_cov_19.206423:65470-68682	gi|1168090852|gb|OQD91613.1|	hypothetical protein PENSOL_c051G01426 [Penicillium solitum]	1	1071	2174	0.0	98.413	100	Penicillium solitum	Trichocomaceae
10	551907at2759	NODE_46_length_250044_cov_23.378095:34446-37116	gi|902276685|emb|CRL19461.1|	CCAAT-binding factor [Penicillium camemberti]	244	1115	1775	0.0	98.509	100	Penicillium camemberti	Trichocomaceae
10	551907at2759	NODE_46_length_250044_cov_23.378095:34446-37116	gi|1168099386|gb|OQD99633.1|	hypothetical protein PENSOL_c006G09639 [Penicillium solitum]	244	1115	1770	0.0	98.394	100	Penicillium solitum	Trichocomaceae
11	341721at2759	NODE_1_length_970254_cov_21.844076:932385-934454	gi|902276431|emb|CRL20833.1|	Nucleolar complex-associated protein 3 [Penicillium camemberti]	1	688	1375	0.0	97.971	100	Penicillium camemberti	Trichocomaceae
11	341721at2759	NODE_1_length_970254_cov_21.844076:932385-934454	gi|1168059665|gb|OQD62193.1|	hypothetical protein PENPOL_c013G03284 [Penicillium polonicum]	1	689	1378	0.0	97.536	100	Penicillium polonicum	Trichocomaceae
12	426305at2759	NODE_36_length_288397_cov_21.960175:244311-248020	gi|902269859|emb|CRL26768.1|	SDA1 [Penicillium camemberti]	22	659	1285	0.0	97.806	76	Penicillium camemberti	Trichocomaceae
12	426305at2759	NODE_36_length_288397_cov_21.960175:244311-248020	gi|973791747|gb|KUM64912.1|	hypothetical protein ACN42_g2140 [Penicillium freii]	22	659	1284	0.0	97.649	76	Penicillium freii	Trichocomaceae
13	777920at2759	NODE_132_length_143079_cov_23.551676:50856-52328	gi|973791895|gb|KUM65050.1|	hypothetical protein ACN42_g1981 [Penicillium freii]	8	477	980	0.0	98.936	100	Penicillium freii	Trichocomaceae
13	777920at2759	NODE_132_length_143079_cov_23.551676:50856-52328	gi|1168102109|gb|OQE02455.1|	hypothetical protein PENSOL_c002G05824 [Penicillium solitum]	8	477	980	0.0	98.936	100	Penicillium solitum	Trichocomaceae
14	836599at2759	NODE_95_length_179942_cov_19.426462:72622-76655	gi|1772434640|gb|KAE8358762.1|	hypothetical protein BDV27DRAFT_150175 [Aspergillus caelatus]	1	1087	1739	0.0	79.129	100	Aspergillus caelatus	Trichocomaceae
14	836599at2759	NODE_95_length_179942_cov_19.426462:72622-76655	gi|1772385217|gb|KAE8315687.1|	terpenoid synthase [Aspergillus transmontanensis]	1	1088	1741	0.0	78.947	100	Aspergillus transmontanensis	Trichocomaceae
15	674160at2759	NODE_83_length_191430_cov_21.529578:33714-41567	gi|1168057359|gb|OQD60117.1|	hypothetical protein PENPOL_c027G04676 [Penicillium polonicum]	1	2618	5315	0.0	98.167	100	Penicillium polonicum	Trichocomaceae
15	674160at2759	NODE_83_length_191430_cov_21.529578:33714-41567	gi|1168090907|gb|OQD91664.1|	hypothetical protein PENSOL_c050G01886 [Penicillium solitum]	1	2618	5330	0.0	98.358	100	Penicillium solitum	Trichocomaceae
16	996662at2759	NODE_2_length_913794_cov_20.833640:562475-563682	gi|1026958413|ref|XP_016603219.1|	Exoribonuclease, phosphorolytic domain 1 [Penicillium expansum]	1	324	652	0.0	97.531	90	Penicillium expansum	Trichocomaceae
16	996662at2759	NODE_2_length_913794_cov_20.833640:562475-563682	gi|924892109|gb|KOS48052.1|	hypothetical protein ACN38_g952 [Penicillium nordicum]	1	362	707	0.0	95.028	100	Penicillium nordicum	Trichocomaceae

## Sheet: Table S2
Table S2 Identification of the Penicillium BenA (beta-tubulin) gene in CMW55930 Assembly 1
Query	E-value	Hit	Identity %	Hit length	Bit score
NODE_108_length_161213_cov_21.674505	0.00	Penicillium_crustosum_CBS115503_BenA_MN969379	100.00	729	1,269.66
NODE_302_length_69772_cov_67.354038	2.62E-115	Penicillium_verrucosum_CBS603.74_BenA_MN969405	100.00	324	410.22
NODE_166_length_116835_cov_23.152067	2.52E-10	Penicillium_verrucosum_CBS603.74_BenA_MN969405	82.35	146	62.21

## Sheet: Table S3
Table S3 BUSCOs identified in MAG1-3 when including and excluding contigs classified by EukRep as prokaryotic
Assembly name	MAG 1	MAG 2	MAG 3
Origin	BlobToolKit	anvi'o	anvi'o
		(de novo)	(reference-based)
Contigs≥1000 bp	882	1356	1388
EukRep classification
Eukaryotic	833	1308	1341
Prokaryotic	49	48	47
BUSCO completeness (single-copy)
Eukaryota: total	238 (93.33%)	238 (93.33%)	249 (97.65%)
Eukaryota: eukaryotic only	234 (91.76%)	234 (91.76%)	245 (96.08%)
Fungi: total	716 (94.46%)	716 (94.46%)	748 (98.68%)
Fungi: eukaryotic only	710 (93.67%)	710 (93.67%)	739 (97.49%)					z

## Sheet: Table S4
Table S4 Teratosphaeria eucalypti contigs with a putative prokaryotic origin that resemble mitochondrial sequences of T. pseudoeucalypti and T. viscida
Query	Present in MAG	BUSCOs?	Number of HSPs	Lowest E-value	Accession (E-value)	Greatest identity %	Greatest HSP length	Greatest bit score
NODE_1245_length_3666_cov_2419.483187	1-3		31	0.00	Tviscidus_51324_contig152_selection_mito	100.00	3666	6,608.97
NODE_886_length_7786_cov_3709.044674	1-3		27	0.00	Tviscidus_51324_contig152_selection_mito	100.00	3458	6,407.08
NODE_1064_length_5275_cov_1511.511072	1-3		42	0.00	TPseudo_eucalyptus_mito_JABBMZ010000132.1	98.90	2913	5,320.77
NODE_1092_length_4770_cov_1840.726960	1-3		24	0.00	TPseudo_eucalyptus_mito_JABBMZ010000132.1	100.00	3150	5,759.14
NODE_1174_length_4072_cov_3345.481369	1-3		20	0.00	TPseudo_eucalyptus_mito_JABBMZ010000132.1	100.00	2682	4,932.38
NODE_6180_length_1014_cov_5431.160090	1-3		2	0.00	TPseudo_eucalyptus_mito_JABBMZ010000132.1	99.70	1014	1,932.99
NODE_865_length_8387_cov_2707.701962	1-3		34	0.00	TPseudo_eucalyptus_mito_JABBMZ010000132.1	98.39	8030	14,580.40
NODE_882_length_8026_cov_1526.424104	1-3		42	0.00	TPseudo_eucalyptus_mito_JABBMZ010000132.1	100.00	8055	14,988.00
NODE_4695_length_1271_cov_2149.415210	2 only		2	5.69E-6	TPseudo_eucalyptus_mito_JABBMZ010000132.1	86.84	38	44.91
NODE_1058_length_5319_cov_43.431652	1-3		0		not available
NODE_1119_length_4530_cov_1275.838329	1&2		0		not available
NODE_1194_length_3977_cov_36.720519	1-3		0		not available
NODE_1202_length_3926_cov_34.823591	1-3		0		not available
NODE_1220_length_3849_cov_13.573616	1-3	x	0		not available
NODE_1238_length_3728_cov_34.108026	1-3		0		not available
NODE_1592_length_2673_cov_83.490181	3 only		0		not available
NODE_172_length_110630_cov_58.225947	3 only	x	0		not available
NODE_1765_length_2397_cov_15.604846	1-3		0		not available
NODE_1785_length_2375_cov_2.437278	1 only		0		not available
NODE_2104_length_2099_cov_29.597363	1-3		0		not available
NODE_2160_length_2061_cov_41.103413	1-3		0		not available
NODE_2447_length_1884_cov_30.863973	3 only		0		not available
NODE_2670_length_1784_cov_16.305371	1-3		0		not available
NODE_2731_length_1758_cov_3056.870632	2 only		0		not available
NODE_2778_length_1739_cov_0.967142	1 only		0		not available
NODE_2962_length_1672_cov_1.684142	1 only		0		not available
NODE_3030_length_1644_cov_1222.978920	2 only		0		not available
NODE_3083_length_1631_cov_3.661569	1-3	x	0		not available
NODE_3201_length_1592_cov_12.194274	1-3		0		not available
NODE_3362_length_1544_cov_116.812147	2 only		0		not available
NODE_3523_length_1501_cov_84.004300	1-3		0		not available
NODE_3524_length_1501_cov_59.216885	3 only		0		not available
NODE_3749_length_1455_cov_0.981175	1 only		0		not available
NODE_4754_length_1260_cov_1.519400	1 only		0		not available
NODE_4778_length_1258_cov_1.220159	1 only		0		not available
NODE_4881_length_1241_cov_67.384201	2&3		0		not available
NODE_5663_length_1129_cov_1326.342971	1&2		0		not available
NODE_5697_length_1128_cov_1.224775	1 only		0		not available
NODE_5707_length_1127_cov_1.687000	1 only		0		not available
NODE_5752_length_1122_cov_1.944724	1 only		0		not available
NODE_5863_length_1108_cov_42.337411	2&3		0		not available
NODE_5879_length_1106_cov_71.654750	2&3		0		not available
NODE_6182_length_1004_cov_112.109464	2&3		0		not available
NODE_683_length_16367_cov_48.561919	1-3		0		not available
NODE_685_length_16208_cov_60.378345	1-3		0		not available
NODE_747_length_12752_cov_30.521464	1-3		0		not available
NODE_769_length_11647_cov_48.686458	1-3	x	0		not available
NODE_775_length_11440_cov_37.977456	1-3		0		not available
NODE_794_length_10519_cov_50.755774	1-3	x	0		not available
NODE_804_length_10147_cov_56.222699	1-3	x	0		not available
NODE_805_length_10116_cov_42.868268	1-3		0		not available
NODE_831_length_9438_cov_46.250752	1-3		0		not available
NODE_839_length_9210_cov_49.087646	1-3		0		not available
NODE_846_length_8864_cov_37.115015	1-3		0		not available
NODE_849_length_8829_cov_42.535907	1-3		0		not available
NODE_852_length_8758_cov_30.905131	1-3	x	0		not available
NODE_870_length_8343_cov_37.364245	1-3		0		not available
NODE_878_length_8121_cov_55.524268	1-3		0		not available
NODE_900_length_7737_cov_29.903022	1-3		0		not available
NODE_902_length_7721_cov_28.479921	1-3		0		not available
NODE_943_length_6918_cov_34.531439	1-3		0		not available
NODE_985_length_6286_cov_18.343126	3 only		0		not available
